# Supplementary material for: Usability of SARS-CoV-2 Self-Testing in a Peer-Assisted Model among Factory Workers in Bengaluru, India: A Mixed- Methods Cross-Sectional Study
Source: Research Square preprint supplement (doi:10.21203/rs.3.rs-7186437/v1), 2025-10-05
Supplement: Supplementary file 1 [file 55e117c1b18c2d278e69790f.docx]

**Usability of SARS-CoV-2 Self-Testing in a Peer-Assisted Model among Factory Workers in Bengaluru, India: A Mixed-Methods Cross-Sectional Study**

Informed Consent Form for Factory employees

**Principal Investigator:**

Name:

Email:

Phone:

**Co-Investigator**

Name:

Email:

Phone:

**Introduction**

Hello,

I am going to give you information and invite you to be part of this research project to help us understand whether assisted COVID-19 self-testing can be used to expand access to testing by delivering high volume serial and on-demand COVID-19 testing to a workforce. You do not have to decide today whether or not you will participate in the research. Before you decide, you can talk to anyone you feel comfortable with about the research.

This consent form may contain words that you do not understand. Please ask me to stop as we go through the information and I will take time to explain. If you have questions later, you can ask them of me or of another researcher.

**Purpose of the research**

COVID-19 has had a devastating impact on the lives and livelihoods of factory workers. Factory workers face a major risk for COVID-19 due to prolonged exposure in highly crowded workspaces. We want to understand whether repeated and regular surveillance through peer assisted self-testing for COVID-19 can be used to identify outbreaks early and make workplaces safer. We want to learn from the employees, their preferences and recommendations about such a testing program and the kind of support and resources that will be required to conduct such testing programs in factories. This will help us develop protocols and guidelines for organizations to maintain business continuity and support the wellbeing of their employees in the face of future surges in the pandemic.

**Type of Intervention**

This study will involve performing an antigen based COVID-19 test by yourself with assistance from a trained peer. The complete process will take about 25 minutes including sample collection, test incubation and reporting results through the mobile application, followed by a 5-10 minute post test interview by the researcher.

**Participant Selection**

You are being invited to take part in this research because we feel that your experience and recommendations from using and performing the assisted self-test can contribute much to our understanding and knowledge of best practices and protocols for optimizing antigen based repeat COVID-19 testing in the workplace.

**Voluntary Participation**

The choice that you make will have no effect on your job or on any work-related evaluations or reports. You may choose not to participate in the study or change your mind later and stop participating even if you agreed earlier.

**Procedures**

You will be offered an antigen based COVID-19 self-test with assistance from a trained peer assistant. You will be given an Instructions for Use (IFU) leaflet and/or video demonstrations about how to perform the test, interpret and report the results using the mobile application provided by the test manufacturer. You will have to come to a designated location in the factory and perform the test under the supervision of a researcher who will be observing the test and collecting details regarding the test process and your experience.

You will be provided a device to click a picture of the test and upload your results directly to the ICMR portal as it is mandated by the government. You will be required to enter your details such as your name, date of birth, phone number, address, gender, nationality and occupation, vaccination details (whether vaccinated or not), COVID-19 details (Whether symptomatic/ have been in contact with a person with COVID-19 in the past 14 days) on the NAVICA IndiaTM app. None of the data entered into the app is stored on the device and the researcher will not have access to data you entered in the app.

During the interview, I or another researcher will sit down with you and ask you some questions about your experience of using the self-test. If you do not wish to answer any of the questions during the interview, you may say so and the interviewer will move on to the next question. No one else but the interviewer will be present unless you would like someone else to be there. The information recorded is confidential, and no one else except the project lead will access the information documented during your interview. The entire interview will be recorded, and it will be kept in password protected folders.

**Risks**

There are no risks due to the testing process. It is possible that you may experience stigma or discomfort in the case of a positive result. To minimize this discomfort, we have ensured that the management has in place all the provisions for the worker to feel supported. If you were to test positive, you will also be linked to supportive care during quarantine via organisation, including a tele-care helpline with follow-up calls during quarantine, provision of a home isolation/monitoring kit and referral links in case of need to escalate care to a hospital. You will also receive compensation during sick leave as per the existing factory policies.

**Benefits**

There will be no direct benefit to patients from this project. All positive cases identified through the project will receive the current standard of care based on severity of illness and national and hospital COVID-19 management guidelines and protocols. Positive cases will be linked to organisation’s tele-care services to support quarantine.

**Remuneration**

You will not be provided any incentive to take part in this demonstration project.

**Confidentiality**

We will not be sharing information about you to anyone outside of the research team. The information that we collect from this research project will be kept private. Any information about you will have a number on it instead of your name. Only the researchers will know what your number is and we will encrypt this information.The research records will be stored securely, and the research team will destroy all the identified data from this study after five years. Your information and biospecimens (nasal swab) collected as part of the research, even if identifiers are removed, will be destroyed and they will not be used or distributed for future research studies.

We would like you to ask us any questions you might have about the study that you do not understand. Please feel free to call the research team at (number) or email us at (email). Also, if you have any questions about your rights and welfare, please contact the local Institutional Review Board (IRB) of Catalyst Foundation.

Signatures:

Your signature shows that we have explained this study to you, that your questions have been answered, and that you agree to take part in this study. You will receive a copy of this form.

Participant Name:

Participant Signature:

Date Signed:

Name of Person Obtaining Consent:

Signature of Person Obtaining Consent:

Date Signed:

If illiterate

I have witnessed the accurate reading of the consent form to the potential participant, and the individual has had the opportunity to ask questions. I confirm that the individual has given consent freely.

Name of witness: Thumb print of participant

Signature of witness:

Date:
