# Supplementary material for: Usability of SARS-CoV-2 Self-Testing in a Peer-Assisted Model among Factory Workers in Bengaluru, India: A Mixed- Methods Cross-Sectional Study
Source: Research Square preprint supplement (doi:10.21203/rs.3.rs-7186437/v1), 2025-10-05
Supplement: Supplementary file 2 [file a56fb86c974c8c7630258acd.xlsx]

## Sheet: Data Analysis Plan
S.No	Research Question	Definition	Comments
1	Demographics	Describe the sample population by age, gender, education levels	NA
2	Usability of SARS-CoV-2 Self-Testing	Number of participants who performed the SARS-CoV-2 test correctly (without any errors on the defined critical steps) versus the total number of participants who performed the test (Average taken across all critical steps) with peer assistance	Without any error = Correctly in the first try + correctly with assistance
			Report common errors on critical and non critical steps
			Report steps where workers required most assistance
3	Usability of the mobile application to report self test results	Number of participants who performed all steps to capture and report the self test results correctly (without any errors on the defined critical steps) versus the total number of participants who performed the test (Average taken across all steps) with peer assistance	Report common errors while using the mobile application
3	Peer Assistance	The estimates of the proportion of peer assistance who provide accurate support to users will be calculated as the ratio of the number of tests for which peers who provided comprehensive instructions during SARS-CoV-2 test operation versus the total number of test assisted, and will be reported as a proportion. The type of errors reported in the self-test support will be reported, in absolute num…	Report steps where peers missed or gave incoorect instructions
6	Inter-Reader Concordance and Accuracy in result interpretation:	The estimate of the proportion of participants who correctly interpret SARS-CoV-2 self-testing results using high resolution pictures of self-test results will be calculated as the ratio of test results correctly interpreted versus the total number of picturized test results, and will be reported as a proportion. The type of errors in reading these results will be reported, in absolute numbers an…	Reported individually for Negative, Positive, Weak Positive and Invalid
7		Percentage of agreement between participant interpretation and a) observer interpretation, and b) manufacturer app interpretation.
8		The measure of the inter-reader agreement will be evaluated by the percentage of agreement between participant interpretation and a) observer interpretation, and b) manufacturer app interpretation. The estimates of the proportion of participants that interpreted their test results correctly will be calculated as the ratio of the number of participants who interpreted the SARS-CoV-2 test results c…
9	Acceptability of SARS-CoV-2 Self-Testing	Preferences for self-testing and barriers to uptake will be analyzed and reported qualitatively from Focus group discussions
11	Acceptability of manufacturer provided app to report self-test results	Qualitative analysis of focus group discussions will further describe the challenges.
