# Supplementary material for: Usability of SARS-CoV-2 Self-Testing in a Peer-Assisted Model among Factory Workers in Bengaluru, India: A Mixed- Methods Cross-Sectional Study
Source: Research Square preprint supplement (doi:10.21203/rs.3.rs-7186437/v1), 2025-10-05
Supplement: Supplementary file 3 [file ad00bf20964577cd1c0915be.docx]

Codebook

| Themes | Codes Generated | Codes Meaning |
| --- | --- | --- |
| Perceived Benefits of Self-testing | time saving,  better sampling,  confidence,  easy to use | Workers under the theme of ‘experience with COVID-19 self testing’ expressed their initial fear due to past painful experiences but they were curious as well as it was a self-test. They recalled uncomfortable procedures in earlier COVID testing. They found COVID-19 self-testing comfortable in terms of process and ease of doing it at homes.  Workers, while comparing with other COVID-19 testing, expressed that self-test saves time, is less painful, is easy and helps them avoid crowded places for testing. Their fear of testing was turned into confidence because of self-testing.  While mentioning the benefits of COVID-19 self-testing, they highlighted that self-testing enables them to know the test result in a shorter period of time which prevents them from spreading infection. |
| Motivations for Self-testing | Safety, precautionary | Workers under the theme of ‘experience with COVID-19 testing’ expressed that they felt safe because of the testing. They understood that testing prevents the spread of infection, hence precautionary in nature. Workers also mentioned that knowing their test results would make them less anxious and would dissociate them from fear of having the infection. |
| Barriers to Self-testing | Fear of positive result, fear of testing, stigma, mobile application | For their overall preferences, they highlighted their fear of positive results and fear of testing as hesitations in uptake of the tests. Associated stigma and discrimination with a positive result was clearly highlighted.  A few also highlighted the challenges in using the mobile application for uploading results. |
| Reflections on Peer Assisted Model | Comfort level with peers, improvement in peer training | In both the factories workers were comfortable with testing as the peers were demonstrating it which highlights the importance of peers. However, a few of them pointed towards the possible improvements in the model. |
